# Supplementary material
Source: PubMed Central journal article supplement (PMC1544060)

37 deg - 5 min

GFP

APP-6e10-Cy3

BACE-7523-Cy5

Merge

Zoom

Control

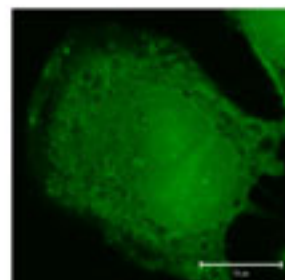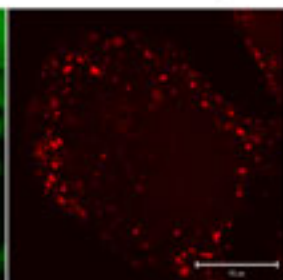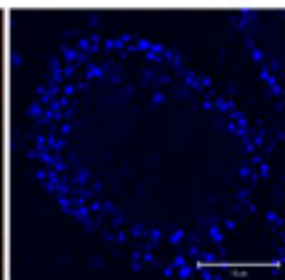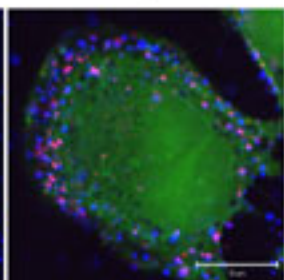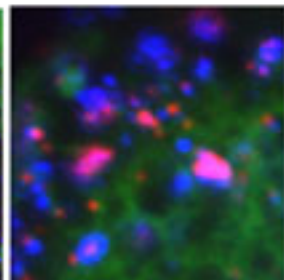

Rab5

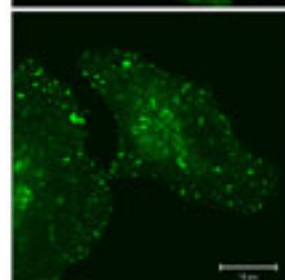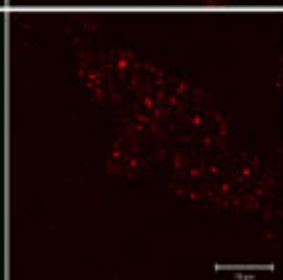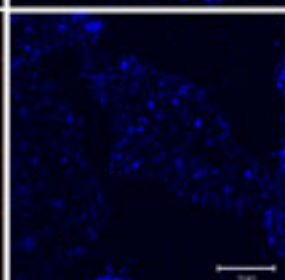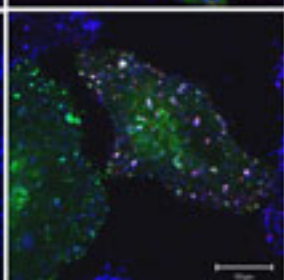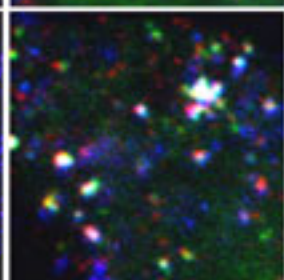

Rab7

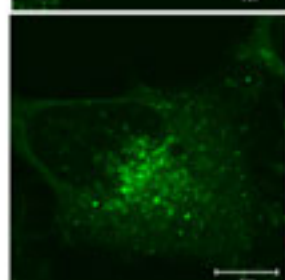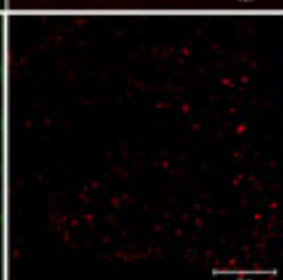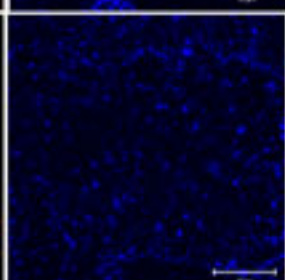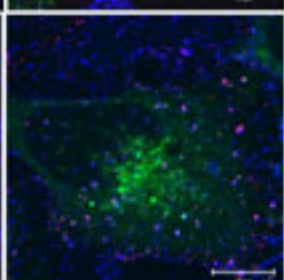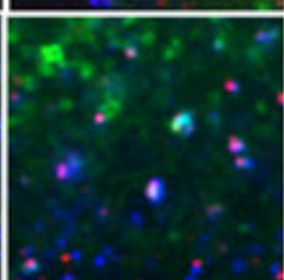

Rab11

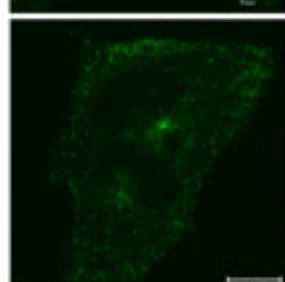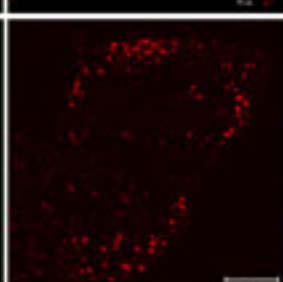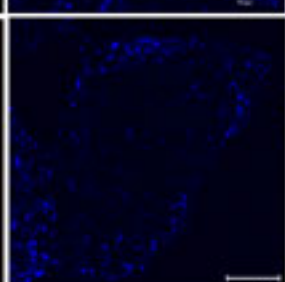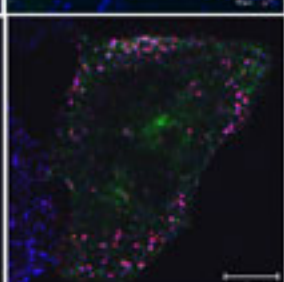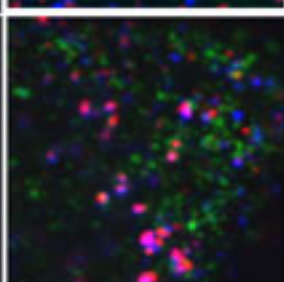

Supplement: pnas_0603838103_5.pdf [file pnas_0603838103_5.pdf]
